# Supplementary material for: Correlating structure and photophysical properties in thiazolo[5,4-d]thiazole crystal derivatives for use in solid-state photonic and fluorescence-based optical devices
Source: Royal Society of Chemistry journal article supplement (doi:10.1039/d3ma00686g), 2023-01-01
Supplement: d3ma00686g1.pdf [file d3ma00686g1.pdf]

# Correlating Structure and Photophysical Properties in Thiazolo[5,4-*d*]thiazole Crystal Derivatives for Use in Solid- State Photonic and Fluorescence-Based Optical Devices

*Abhishek Shibu, Sean Jones, P. Lane Tolley, David Diaz, Carly O. Kwiatkowski, Daniel S. Jones,  
Jessica M. Shivas, Jonathan J. Foley IV, Thomas A. Schmedake, and Michael G. Walter\**

Department of Chemistry, University of North Carolina at Charlotte, Charlotte, NC, 28223,

\*Michael.Walter@uncc.edu

## TABLE OF CONTENTS

### Section 1: Spectra Characterization

Section 1.1:  $^1\text{H-NMR}$  Spectra.....3

Section 1.2: MALDI-TOF-MS.....7

### Section 2: X-Ray Characterization

Section 2.1: Single Crystal Structure Data and Refinement.....8

Section 2.2: Correlation between Volume of Unit Cell and Alkyl Chain Length.....9

Section 2.3: Pictorial representation of interaction energies in TTz crystals.....10

Section 2.4: Intermolecular interaction energies in TTz crystals.....11

Section 2.5: List of contacts from crystal packing data of  $(\text{C}_n\text{OPh})_2\text{TTz}$  crystals....12

Section 2.6: Atom labelling sequence.....13

Section 2.7: Distribution of intermolecular contacts to Hirshfeld surface area.....14

Section 2.8: Shape index of the Hirshfeld surfaces.....15

Section 2.9: Powder X-Ray Diffractograms of TTz Crystals.....16

### Section 3: Photophysical Characterization

Section 3.1: DFT Simulated Raman Spectra.....17

Section 3.2: Lattice-Phonon Raman Spectra of TTz Crystals.....17

Section 3.3: Photostability of TTz Crystals.....18

Section 4: References.....18

## Section 1: Spectra Characterization

### Section 1.1: $^1\text{H-NMR}$ Spectra

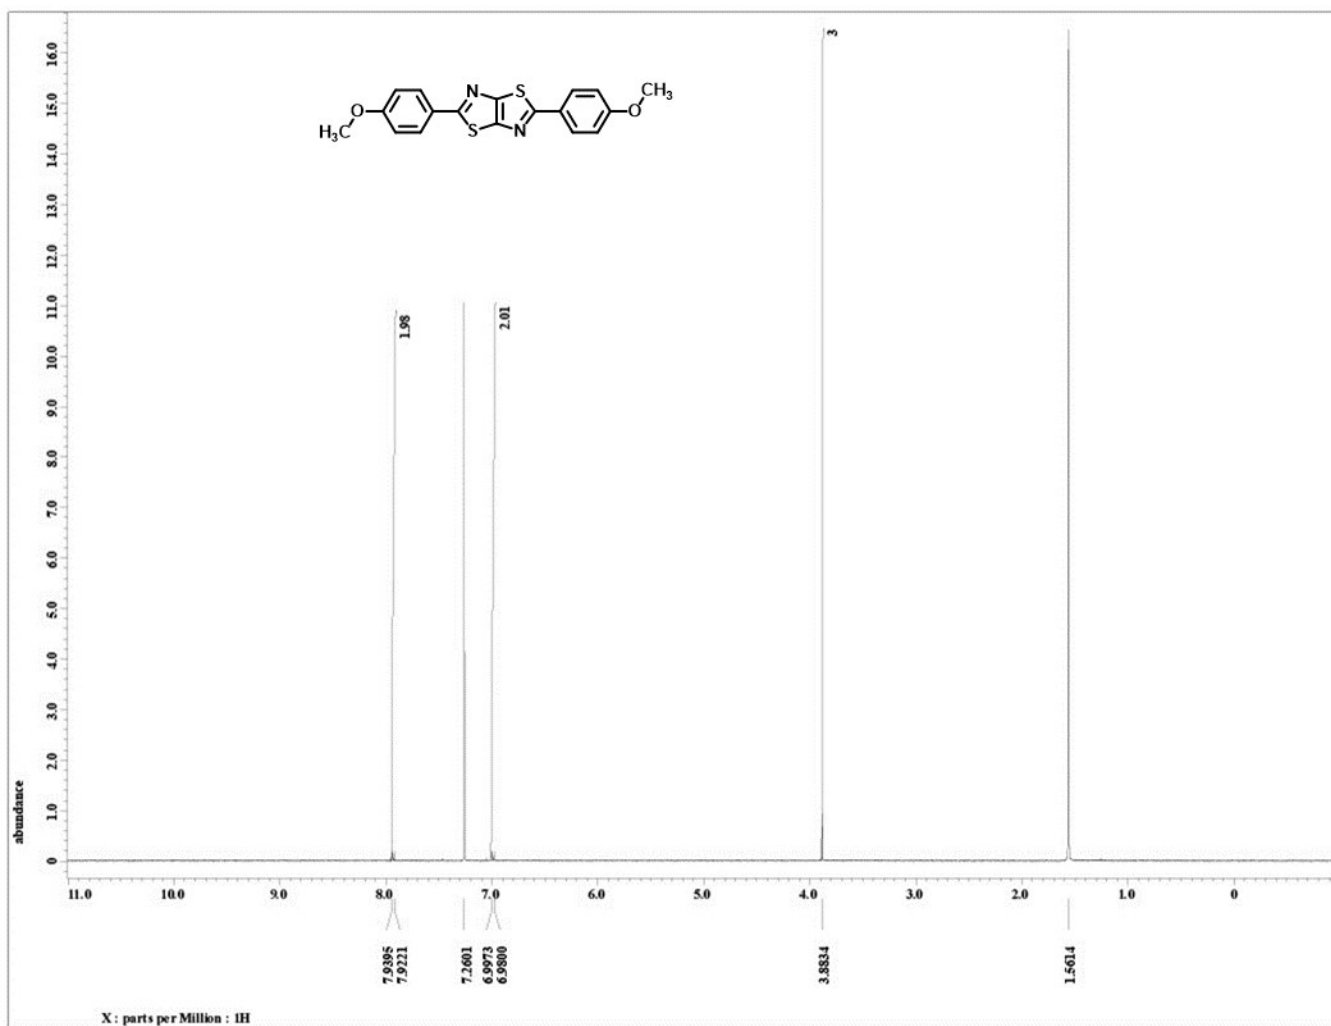

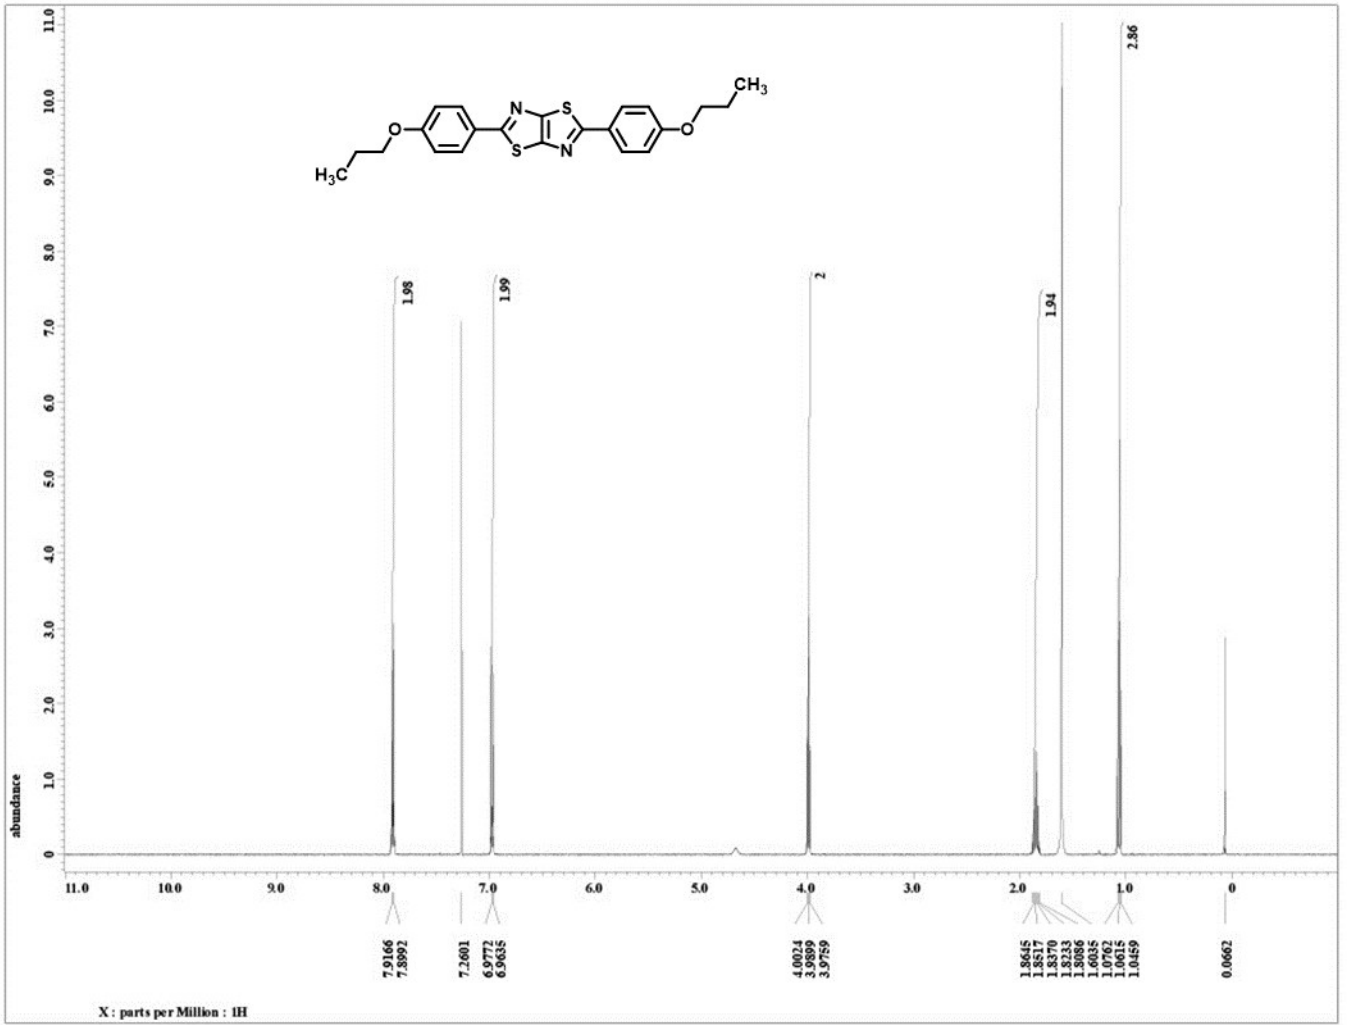

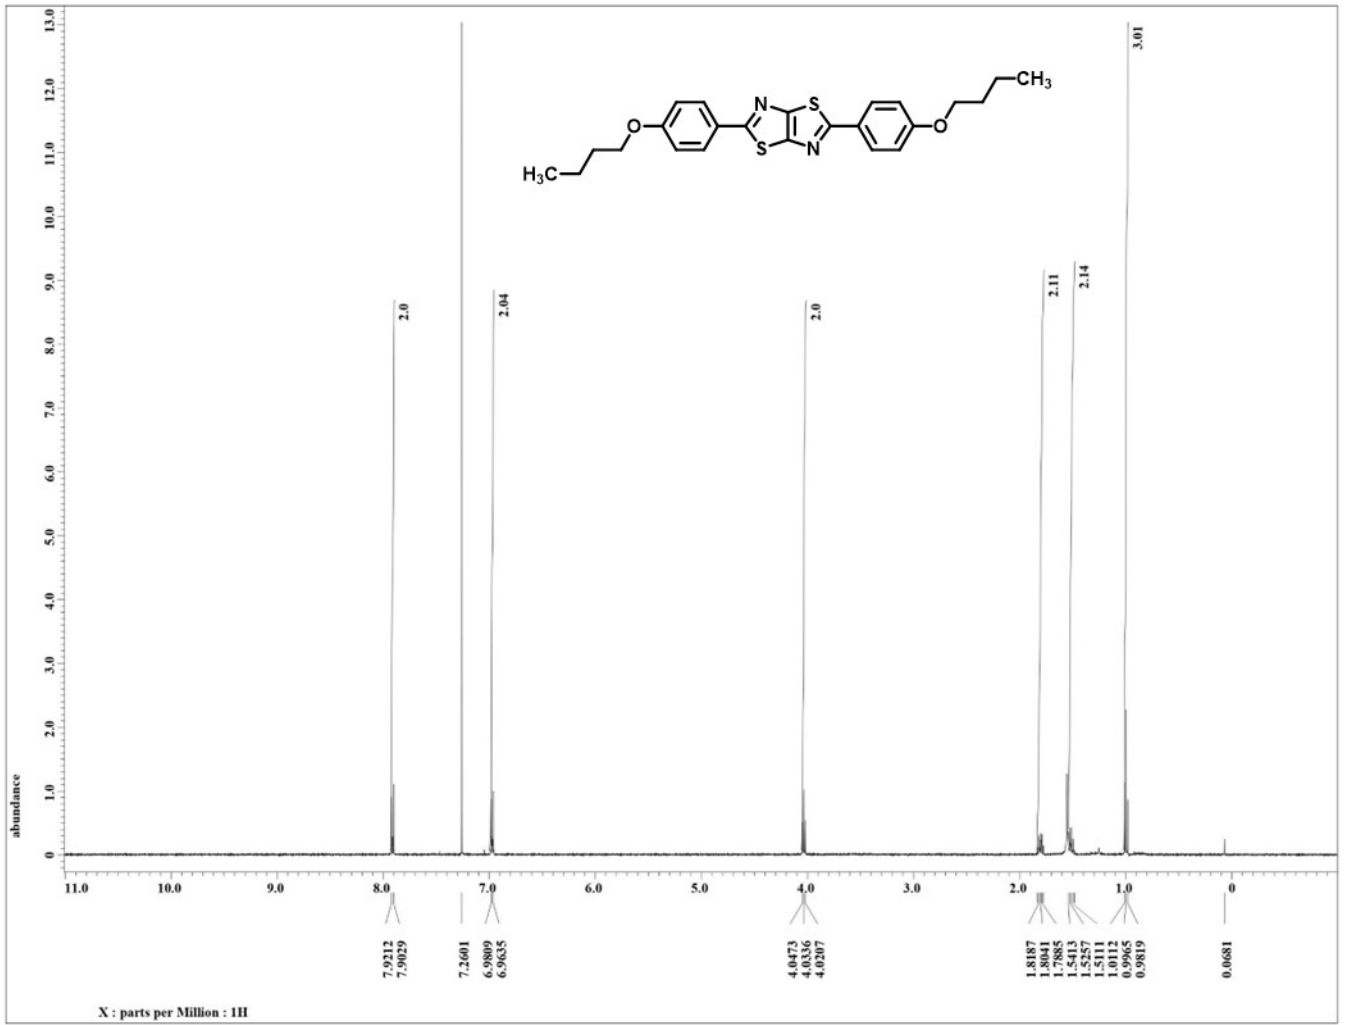

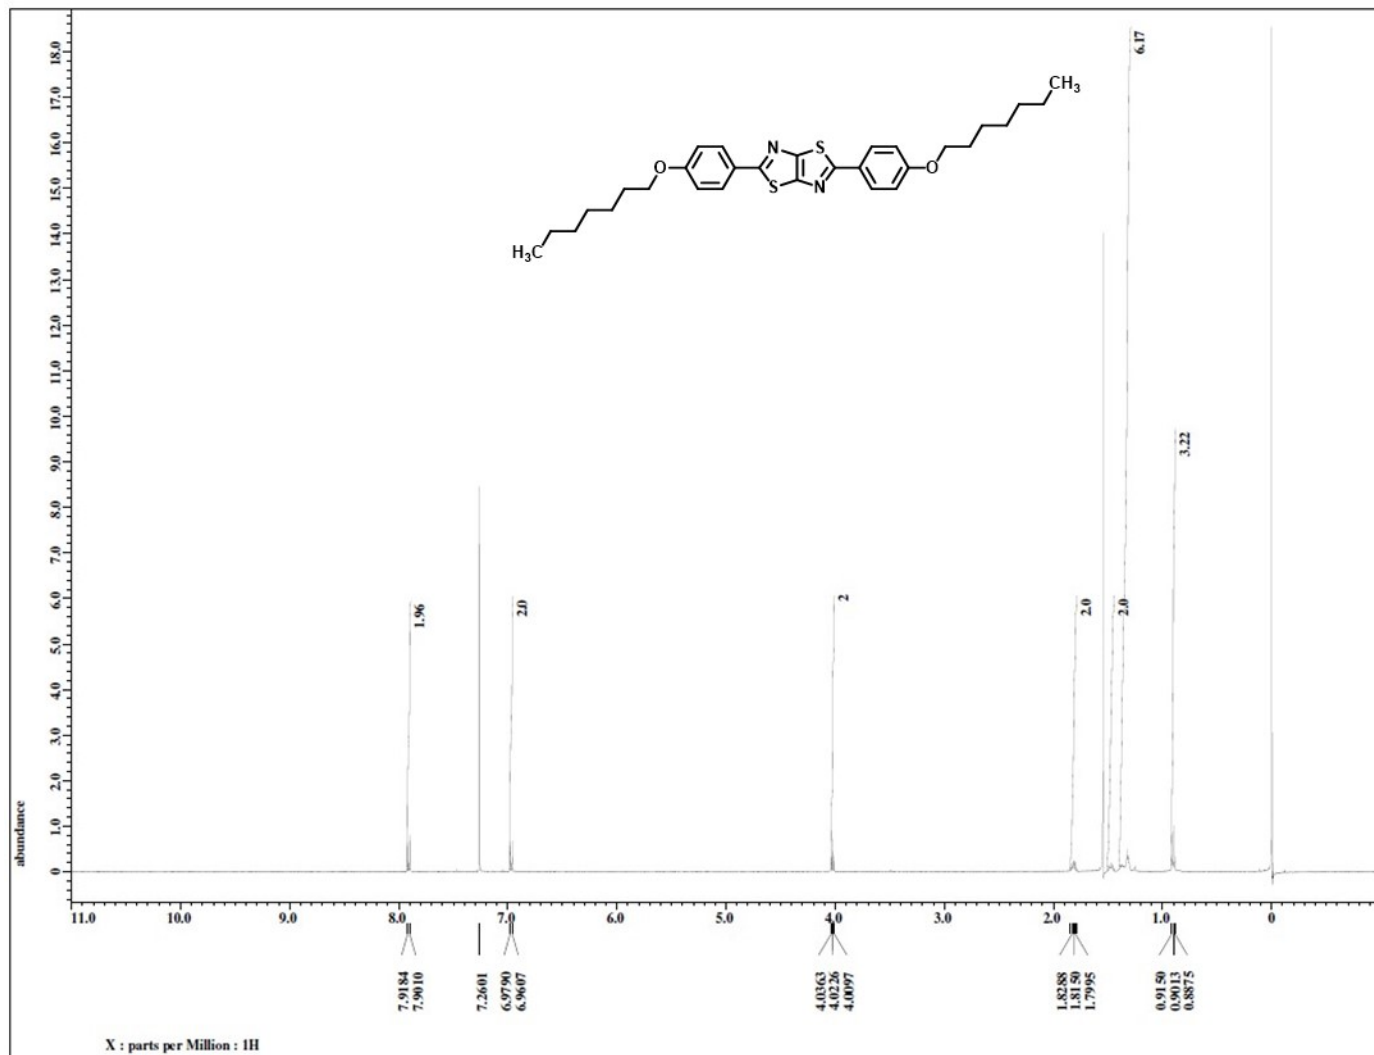

## Section 1.2: MALDI-TOF-MS

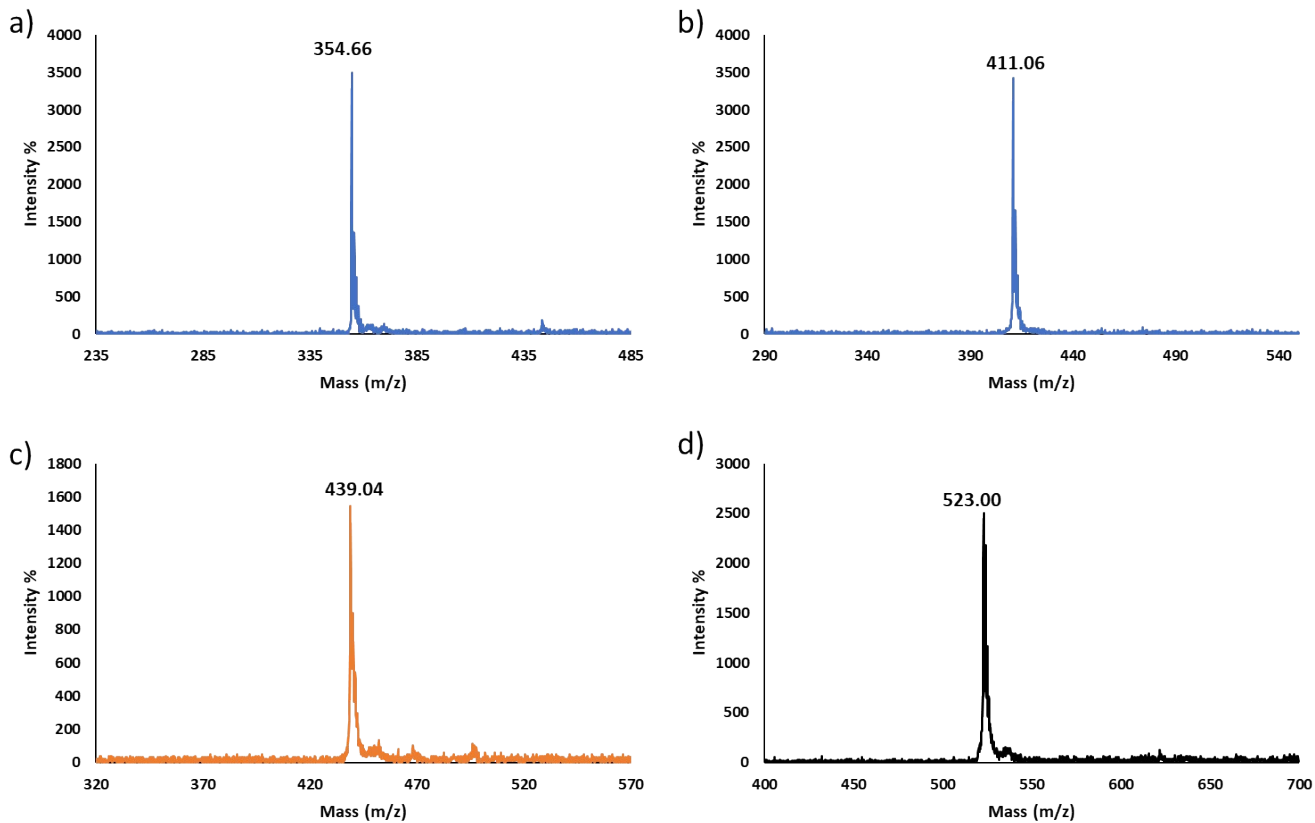

**Figure S1:** Maldi-TOF-MS Spectra of a) (MeOPh)<sub>2</sub>TTz, b) (PrOPh)<sub>2</sub>TTz, c) (BuOPh)<sub>2</sub>TTz, and d) (HepOPh)<sub>2</sub>TTz

## Section 2: X-Ray Characterization

### Section 2.1: Single Crystal Structure Data and Refinement

**Table S1: Summary of crystallographic data of dialkoxyphenyl TTz**

|                                             |                                                                              |                                                                              |                                                                              |
|---------------------------------------------|------------------------------------------------------------------------------|------------------------------------------------------------------------------|------------------------------------------------------------------------------|
| Identification code                         | (PrOPh) <sub>2</sub> TTz                                                     | (BuOPh) <sub>2</sub> TTz                                                     | (HepOPh) <sub>2</sub> TTz                                                    |
| CSD Deposition Number                       | 2257069                                                                      | 2257068                                                                      | 2257067                                                                      |
| Empirical formula                           | C <sub>22</sub> H <sub>22</sub> N <sub>2</sub> O <sub>2</sub> S <sub>2</sub> | C <sub>24</sub> H <sub>26</sub> N <sub>2</sub> O <sub>2</sub> S <sub>2</sub> | C <sub>30</sub> H <sub>38</sub> N <sub>2</sub> O <sub>2</sub> S <sub>2</sub> |
| Formula weight                              | 410.564                                                                      | 438.618                                                                      | 522.781                                                                      |
| Temperature/K                               | 100.00(10)                                                                   | 100.00(10)                                                                   | 100.00(10)                                                                   |
| Crystal system                              | monoclinic                                                                   | triclinic                                                                    | monoclinic                                                                   |
| Space group                                 | P2 <sub>1</sub> /c                                                           | P-1                                                                          | P2 <sub>1</sub> /c                                                           |
| a/Å                                         | 16.2976(4)                                                                   | 5.4441(5)                                                                    | 31.0223(11)                                                                  |
| b/Å                                         | 7.46099(19)                                                                  | 7.4759(7)                                                                    | 7.1900(3)                                                                    |
| c/Å                                         | 7.9920(2)                                                                    | 14.1023(13)                                                                  | 6.0107(2)                                                                    |
| α/°                                         | 90                                                                           | 84.330(8)                                                                    | 90                                                                           |
| β/°                                         | 96.418(2)                                                                    | 82.922(8)                                                                    | 91.400(3)                                                                    |
| γ/°                                         | 90                                                                           | 70.044(8)                                                                    | 90                                                                           |
| Volume/Å <sup>3</sup>                       | 965.71(4)                                                                    | 534.39(9)                                                                    | 1340.29(9)                                                                   |
| Z                                           | 2                                                                            | 1                                                                            | 2                                                                            |
| ρ <sub>calc</sub> /cm <sup>3</sup>          | 1.412                                                                        | 1.363                                                                        | 1.295                                                                        |
| μ/mm <sup>-1</sup>                          | 2.669                                                                        | 2.446                                                                        | 2.032                                                                        |
| F(000)                                      | 434.6                                                                        | 233.3                                                                        | 562.9                                                                        |
| Crystal size/mm <sup>3</sup>                | 0.378 × 0.364 × 0.197                                                        | 0.565 × 0.511 × 0.036                                                        | 0.165 × 0.141 × 0.035                                                        |
| Radiation                                   | Cu Kα (λ = 1.54184)                                                          | Cu Kα (λ = 1.54184)                                                          | Cu Kα (λ = 1.54184)                                                          |
| 2θ range for data collection/°              | 10.92 to 133.34                                                              | 12.62 to 133.6                                                               | 8.56 to 133.84                                                               |
| Index ranges                                | -19 ≤ h ≤ 19, -7 ≤ k ≤ 8, -9 ≤ l ≤ 8                                         | -6 ≤ h ≤ 5, -8 ≤ k ≤ 6, -16 ≤ l ≤ 16                                         | -36 ≤ h ≤ 36, -8 ≤ k ≤ 7, -6 ≤ l ≤ 7                                         |
| Reflections collected                       | 8742                                                                         | 4008                                                                         | 12196                                                                        |
| Independent reflections                     | 1698 [R <sub>int</sub> = 0.0335, R <sub>sigma</sub> = 0.0206]                | 1873 [R <sub>int</sub> = 0.0374, R <sub>sigma</sub> = 0.0367]                | 2371 [R <sub>int</sub> = 0.0772, R <sub>sigma</sub> = 0.0466]                |
| Data/restraints/parameters                  | 1698/0/141                                                                   | 1873/0/137                                                                   | 2371/0/176                                                                   |
| Goodness-of-fit on F <sup>2</sup>           | 1.075                                                                        | 1.075                                                                        | 1.103                                                                        |
| Final R indexes [I >= 2σ (I)]               | R <sub>1</sub> = 0.0300, wR <sub>2</sub> = 0.0733                            | R <sub>1</sub> = 0.0366, wR <sub>2</sub> = 0.0945                            | R <sub>1</sub> = 0.0744, wR <sub>2</sub> = 0.2012                            |
| Final R indexes [all data]                  | R <sub>1</sub> = 0.0358, wR <sub>2</sub> = 0.0780                            | R <sub>1</sub> = 0.0431, wR <sub>2</sub> = 0.1008                            | R <sub>1</sub> = 0.0971, wR <sub>2</sub> = 0.2214                            |
| Largest diff. peak/hole / e Å <sup>-3</sup> | 0.22/-0.28                                                                   | 0.40/-0.28                                                                   | 0.82/-0.43                                                                   |



## Section 2.2: Correlation between Volume of Unit Cell and Alkyl Chain Length

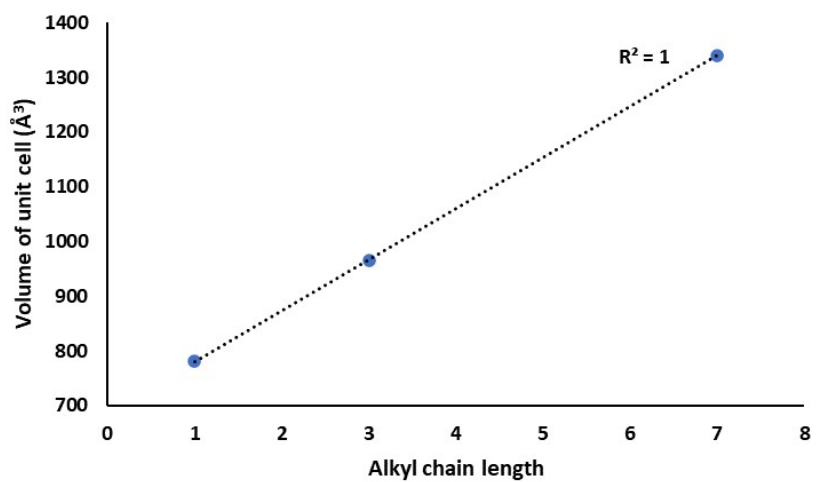

**Figure S2:** Crystals packed in monoclinic crystal system showed a perfect correlation between volume of unit cell and alkyl chain length.

## Section 2.3: Pictorial representation of interaction energies in TTz crystals

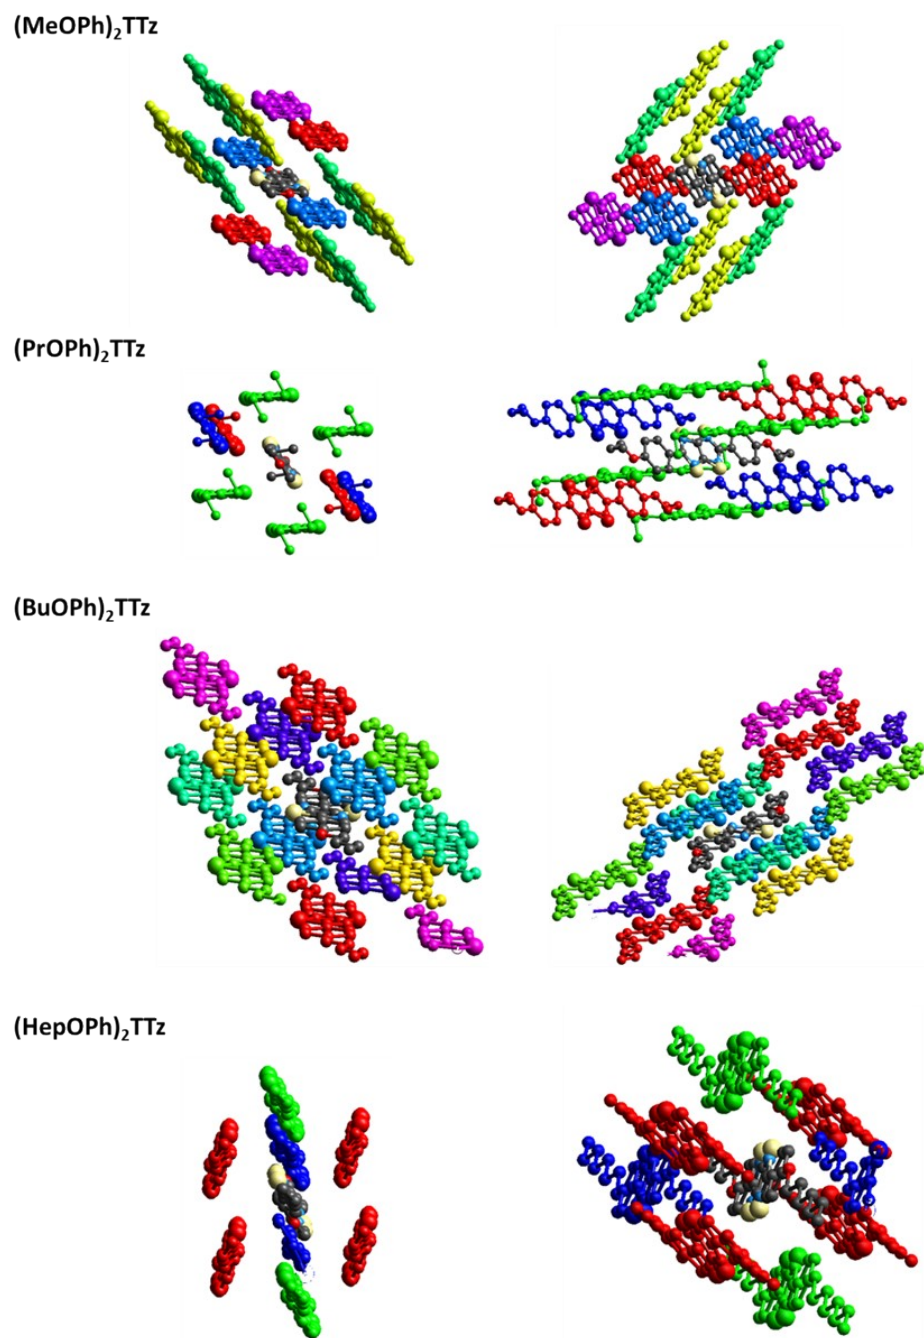

**Figure S3:** Color-coded pictorial representation of interaction energy in TTz crystals with respect to one central reference molecule.

## Section 2.4: Intermolecular interaction energies in TTz crystals

**Table S2: Details of intermolecular interaction energies in TTz crystals**

|                                | Pair label<br>( <i>cf</i> Fig 3) | Orientation | Color  | N | R (Å) | E <sub>ele</sub><br>(kJ/mol) | E <sub>pol</sub><br>(kJ/mol) | E <sub>dis</sub><br>(kJ/mol) | E <sub>rep</sub><br>(kJ/mol) | E <sub>tot</sub><br>(kJ/mol) |
|--------------------------------|----------------------------------|-------------|--------|---|-------|------------------------------|------------------------------|------------------------------|------------------------------|------------------------------|
| <b>(MeOPh)<sub>2</sub>TTz</b>  | a)                               | Cofacial    | Red    | 2 | 3.98  | -6.98                        | -2.44                        | -80.74                       | 36.34                        | -53.70                       |
|                                | b)                               | Orthogonal  | Green  | 4 | 10.67 | -11.73                       | -1.48                        | -25.69                       | 14.28                        | -24.60                       |
|                                | c)                               | Parallel    | Blue   | 2 | 19.04 | -7.82                        | -1.18                        | -8.80                        | 0.00                         | -17.90                       |
|                                | d)                               | Orthogonal  | Yellow | 4 | 11.47 | -5.60                        | -0.89                        | -16.03                       | 6.30                         | -16.20                       |
| <b>(PrOPh)<sub>2</sub>TTz</b>  |                                  | Cofacial    | Purple | 2 | 18.52 | 3.28                         | -0.37                        | -5.75                        | 0.00                         | -2.80                        |
|                                | e)                               | Orthogonal  | Green  | 4 | 5.47  | -54.65                       | -7.03                        | -101.65                      | 93.75                        | -69.70                       |
|                                | f)                               | Cofacial    | Blue   | 2 | 7.99  | -28.12                       | -5.25                        | -58.62                       | 75.52                        | -16.60                       |
|                                | g)                               | Cofacial    | Red    | 2 | 18.94 | -0.11                        | -0.07                        | -8.97                        | 0.00                         | -9.20                        |
| <b>(BuOPh)<sub>2</sub>TTz</b>  | h)                               | Cofacial    | Red    | 2 | 15.29 | -11.20                       | -1.41                        | -58.53                       | 0.00                         | -71.10                       |
|                                |                                  | Cofacial    | Blue   | 2 | 14.1  | 1.16                         | -1.70                        | -68.29                       | 0.00                         | -68.80                       |
|                                |                                  | Cofacial    | Green  | 2 | 15.96 | -29.81                       | -1.26                        | -27.35                       | 0.00                         | -58.50                       |
|                                |                                  | Cofacial    | Teal   | 2 | 14.48 | -10.36                       | -2.00                        | -33.01                       | 0.00                         | -45.40                       |
|                                |                                  | Cofacial    | Yellow | 2 | 5.44  | -10.36                       | -5.25                        | -44.68                       | 22.93                        | -37.40                       |
|                                |                                  | Cofacial    | Purple | 2 | 28.46 | 0.85                         | 0.00                         | -4.88                        | 0.00                         | -4.00                        |
|                                |                                  | Cofacial    | Pink   | 2 | 28.8  | 0.11                         | 0.00                         | -0.70                        | 0.00                         | -0.60                        |
| <b>(HepOPh)<sub>2</sub>TTz</b> | i)                               | Orthogonal  | Red    | 4 | 4.69  | -72.51                       | 0.00                         | -137.88                      | 99.37                        | -111.00                      |
|                                | j)                               | Cofacial    | Green  | 2 | 6.01  | -79.06                       | -7.62                        | -78.39                       | 110.44                       | -54.70                       |
|                                |                                  | Cofacial    | Blue   | 2 | 33.54 | 0.21                         | 0.00                         | -7.06                        | 0.00                         | -6.80                        |

R = distance between molecular centroids

$$E_{\text{tot}} = E_{\text{ele}} + E_{\text{pol}} + E_{\text{dis}} + E_{\text{rep}}$$

Where,

E<sub>ele</sub> = classical electrostatic energy of interaction between monomer charge distributions

E<sub>rep</sub> = exchange–repulsion energy

E<sub>dis</sub> = dispersion energy

E<sub>pol</sub> = Polarization energy

Since k<sub>B</sub>T = 2.5 kJ/mol and the error to which the sublimation enthalpy can be measured is

approximately 5 kJ/mol for organic compounds, molecular pairs with E<sub>tot</sub> ~ 5 kJ/mol should be

ignored.

## Section 2.5: List of contacts from crystal packing data of (C<sub>n</sub>OPh)<sub>2</sub>TTz crystals

**Table S3: (C<sub>n</sub>OPh)<sub>2</sub>TTz crystal packing data with emphasis on interchromophoric interactions. For atom labelling sequence *cf.* Figure S4.**

|                                   | Pair label<br>( <i>cf.</i> Fig 3)                    | Orientation | Color      | Interaction                              | Distance, (Å)                     | Angle, (degrees) | Frequency of Interaction | Number of molecules               | Total |        |   |   |   |
|-----------------------------------|------------------------------------------------------|-------------|------------|------------------------------------------|-----------------------------------|------------------|--------------------------|-----------------------------------|-------|--------|---|---|---|
| <b>(MeOPh)<sub>2</sub>TTz</b>     | a)                                                   | Cofacial    | Red        | C <sub>9</sub> -H—O <sub>1</sub>         | 2.935                             | 149.48           | 2                        | 2                                 | 4     |        |   |   |   |
|                                   |                                                      |             |            | $\pi$ - $\pi$ <sub>phenyl</sub> centroid | 3.985                             |                  | 2                        | 2                                 | 4     |        |   |   |   |
|                                   |                                                      | b)          | Orthogonal | Green                                    | C <sub>5</sub> -H—S <sub>1</sub>  | 3.519            | 120.35                   | 1                                 | 4     | 4      |   |   |   |
|                                   |                                                      |             |            |                                          | C <sub>5</sub> -H—N <sub>1</sub>  | 2.964            | 178.48                   | 1                                 | 4     | 4      |   |   |   |
|                                   |                                                      |             |            |                                          | C <sub>9</sub> —S <sub>1</sub>    | 3.468            | 173.66                   | 1                                 | 4     | 4      |   |   |   |
|                                   |                                                      | c)          |            | Yellow                                   | C <sub>9</sub> -H—N <sub>1</sub>  | 2.912            | 161.62                   | 1                                 | 4     | 4      |   |   |   |
|                                   |                                                      |             |            |                                          | C <sub>7</sub> -H—S <sub>1</sub>  | 3.851            | 169.5                    | 1                                 | 4     | 4      |   |   |   |
|                                   |                                                      | d)          | Parallel   | Blue                                     | C <sub>9</sub> -H—O <sub>1</sub>  | 2.537            | 144.74                   | 2                                 | 2     | 4      |   |   |   |
|                                   | <b>(PrOPh)<sub>2</sub>TTz</b>                        | e)          | Orthogonal | Green                                    | C <sub>8</sub> -H—S <sub>1</sub>  | 3.839            |                          | 1                                 | 4     | 4      |   |   |   |
|                                   |                                                      |             |            |                                          | C <sub>10</sub> -H—O <sub>1</sub> | 3.249            | 127.93                   | 1                                 | 4     | 4      |   |   |   |
| C <sub>11</sub> -H—O <sub>1</sub> |                                                      |             |            |                                          | 3.44                              | 122.36           | 1                        | 4                                 | 4     |        |   |   |   |
| C <sub>10</sub> -H—O <sub>1</sub> |                                                      |             |            |                                          | 3.922                             | 135.47           | 1                        | 4                                 | 4     |        |   |   |   |
| C <sub>2</sub> —S <sub>1</sub>    |                                                      |             |            |                                          | 3.38                              |                  | 1                        | 4                                 | 4     |        |   |   |   |
| S—S                               |                                                      |             |            |                                          | 3.488                             |                  | 1                        | 4                                 | 4     |        |   |   |   |
| C <sub>7</sub> -H—C <sub>3</sub>  |                                                      |             |            |                                          | 2.88                              | 136.06           | 1                        | 4                                 | 4     |        |   |   |   |
| S <sub>1</sub> —C <sub>3</sub>    |                                                      |             |            |                                          | 3.327                             |                  | 1                        | 4                                 | 4     |        |   |   |   |
| C <sub>4</sub> —S <sub>1</sub>    |                                                      |             |            |                                          | 3.379                             |                  | 1                        | 4                                 | 4     |        |   |   |   |
|                                   |                                                      |             |            |                                          | f)                                | Cofacial         | Blue                     | C <sub>7</sub> -H—N <sub>1</sub>  | 3.35  | 126.41 | 2 | 2 | 4 |
|                                   |                                                      |             |            |                                          |                                   |                  |                          | C <sub>9</sub> -H—N <sub>1</sub>  | 2.986 | 72.88  | 2 | 2 | 4 |
|                                   |                                                      |             |            |                                          |                                   |                  |                          | C <sub>8</sub> —S <sub>1</sub>    | 3.456 |        | 2 | 2 | 4 |
|                                   |                                                      |             |            |                                          | g)                                | Cofacial         | Red                      | C <sub>11</sub> -H—O <sub>1</sub> | 3.799 | 142.93 | 2 | 2 | 4 |
| <b>(BuOPh)<sub>2</sub>TTz</b>     |                                                      | h)          | Cofacial   | Red                                      | C <sub>12</sub> -H—S <sub>1</sub> | 3.266            | 123.54                   | 2                                 | 14    | 28     |   |   |   |
|                                   | C <sub>9</sub> -H—O <sub>1</sub>                     |             |            |                                          | 3.321                             | 124.83           | 2                        | 14                                | 28    |        |   |   |   |
|                                   | C <sub>12</sub> -H—N <sub>1</sub>                    |             |            |                                          | 3.255                             | 170.66           | 2                        | 14                                | 28    |        |   |   |   |
|                                   | C <sub>10</sub> -H— $\pi$ <sub>phenyl</sub> centroid |             |            |                                          | 2.856                             | 138.1            | 2                        | 14                                | 28    |        |   |   |   |
|                                   | C <sub>11</sub> -H— $\pi$ <sub>phenyl</sub> centroid |             |            |                                          | 3.591                             |                  | 2                        | 14                                | 28    |        |   |   |   |
|                                   | C <sub>12</sub> -H—TTZ <sub>centroid</sub>           |             |            |                                          | 3.601                             | 142.8            | 2                        | 14                                | 28    |        |   |   |   |

|                           |    |            |       |                                    |       |        |   |   |   |
|---------------------------|----|------------|-------|------------------------------------|-------|--------|---|---|---|
| (HepOPh) <sub>2</sub> TTz | i) | Orthogonal | Red   | C <sub>10</sub> -H-O <sub>1</sub>  | 3.11  | 141.73 | 1 | 4 | 4 |
|                           |    |            |       | C <sub>5</sub> -H-O <sub>1</sub>   | 3.893 | 147.75 | 1 | 4 | 4 |
|                           |    |            |       | C <sub>11</sub> -H-O <sub>1</sub>  | 3.519 | 131.74 | 1 | 4 | 4 |
|                           |    |            |       | C <sub>9</sub> -H-O <sub>1</sub>   | 3.016 | 144.94 | 1 | 4 | 4 |
|                           |    |            |       | C <sub>4</sub> -H-S <sub>1</sub>   | 3.599 | 123.69 | 1 | 4 | 4 |
|                           |    |            |       | C <sub>7</sub> -H-C <sub>6</sub>   | 2.826 | 124.37 | 1 | 4 | 4 |
|                           |    |            |       | S <sub>1</sub> -C <sub>2</sub>     | 3.311 |        | 1 | 4 | 4 |
|                           |    |            |       | S <sub>1</sub> -C <sub>1</sub>     | 3.392 |        | 1 | 4 | 4 |
|                           |    |            |       | C <sub>4</sub> -H-C <sub>3</sub>   | 2.895 | 124.17 | 1 | 4 | 4 |
|                           |    |            |       | C <sub>4</sub> -H-C <sub>2</sub>   | 2.892 | 144.2  | 1 | 4 | 4 |
|                           | j) | Cofacial   | Green | C <sub>11</sub> -H-O <sub>1</sub>  | 3.062 | 170.29 | 2 | 2 | 4 |
|                           |    |            |       | C <sub>7</sub> -H-H-C <sub>9</sub> | 2.345 | 157.81 | 2 | 2 | 4 |
|                           |    |            |       | S-S                                | 3.118 |        | 1 | 2 | 2 |

## Section 2.6: Atom labelling sequence

The atom labelling sequence of (HepOPh)<sub>2</sub>TTz is shown in Figure S3. Truncated labelling sequence can be used for other TTz derivatives.

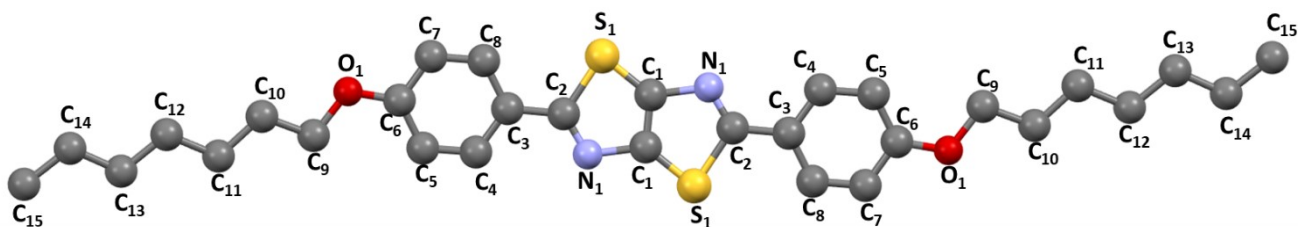

**Figure S4.** (HepOPh)<sub>2</sub>TTz with labelled non-hydrogen atoms

## Section 2.7: Distribution of intermolecular contacts to Hirshfeld surface area

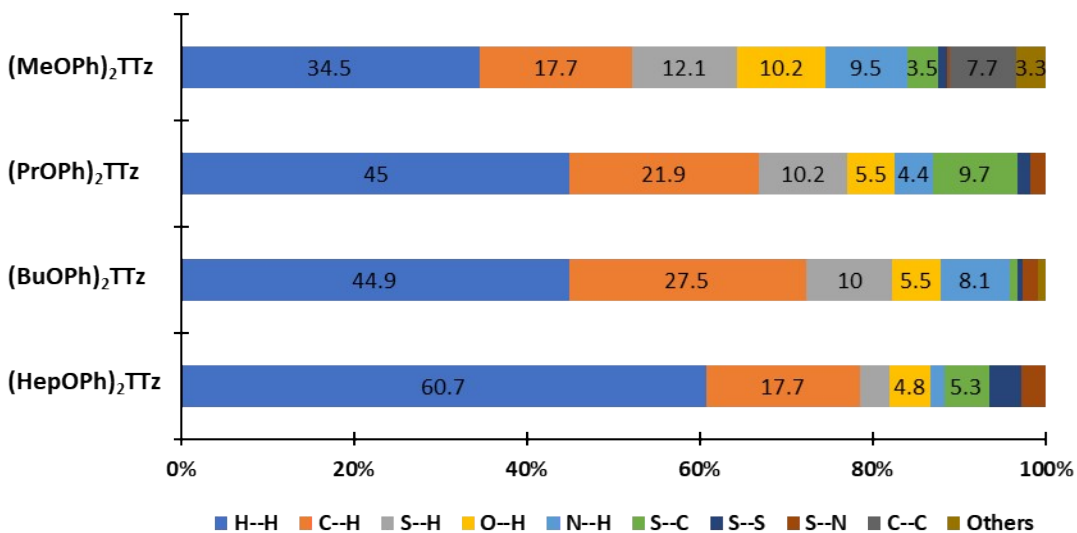

**Figure S5:** Relative contribution of the intermolecular contacts to the Hirshfeld surface area for (CnOPh)<sub>2</sub>TTz crystals.

## Section 2.8: Shape index of the Hirshfeld surfaces

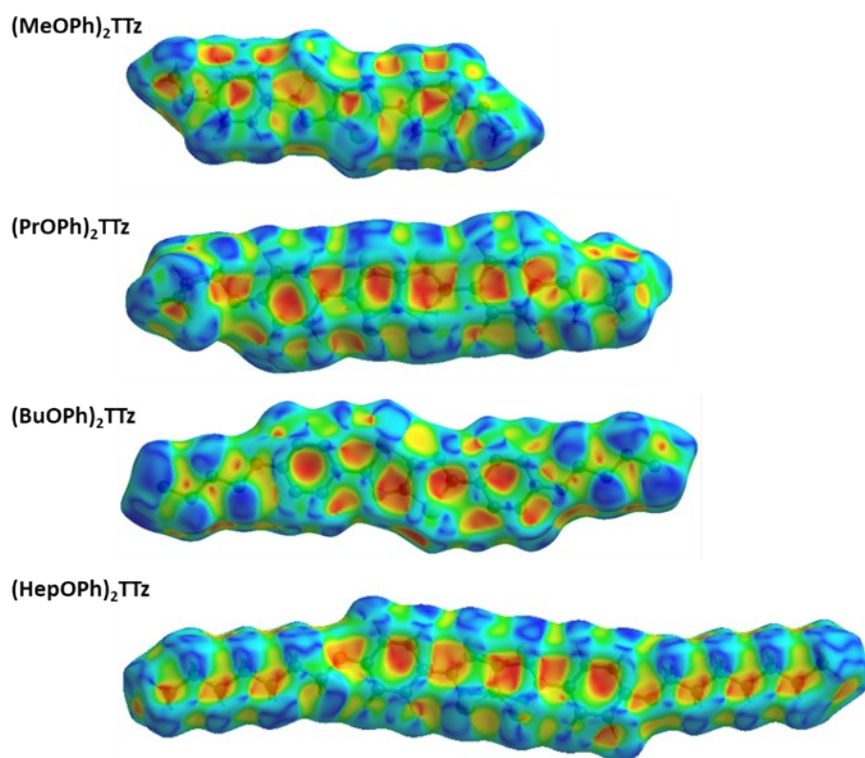

**Figure S6.** Shape index of the Hirshfeld surfaces of the  $(C_nOPh)_2TTz$  crystals.  $\pi$ - $\pi$  orbital overlap is represented by adjacent red and blue triangles on the Hirshfeld surface. The absence of adjacent red and blue triangles is indicative of lack of  $\pi$ - $\pi$  orbital overlap.<sup>1</sup>

## Section 2.9: Powder X-Ray Diffractograms of TTz Crystals

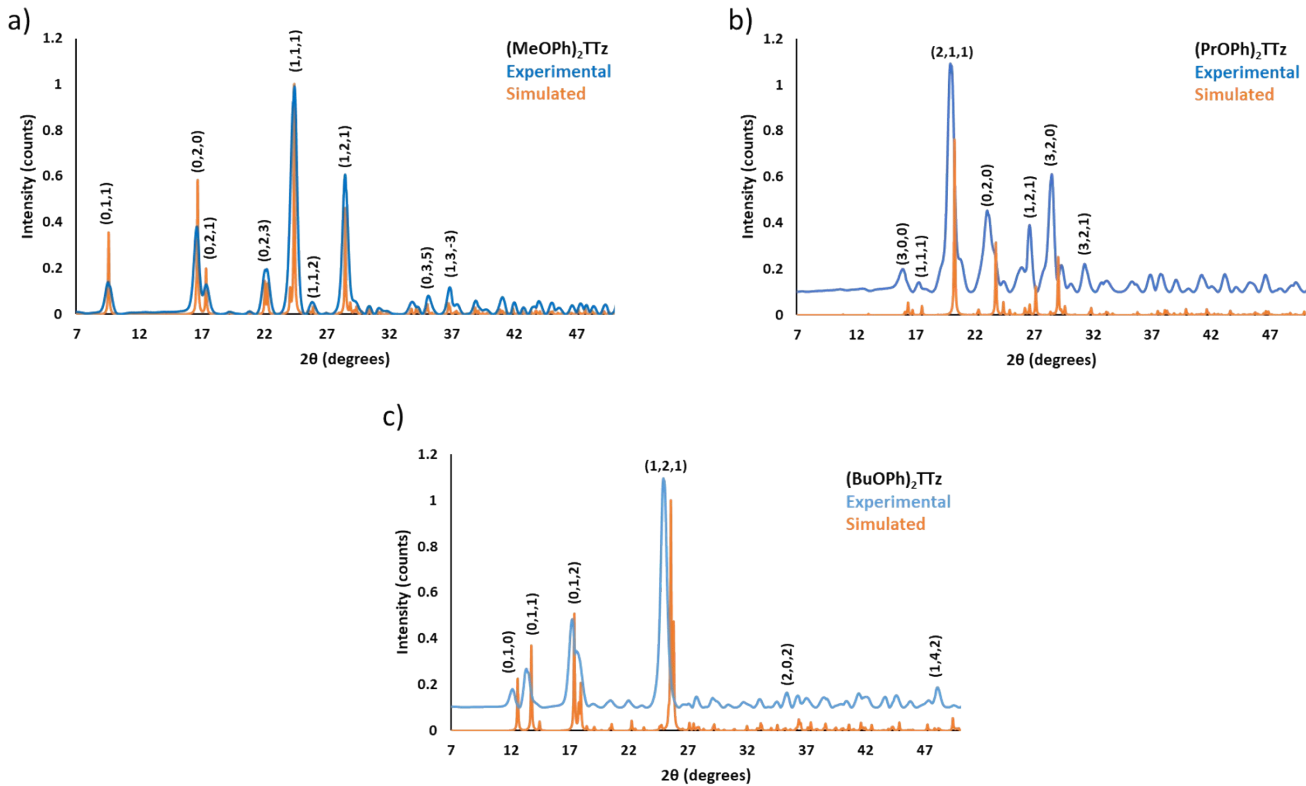

**Figure S7:** Comparison of experimental and simulated powder XRD patterns of a) (MeOPh)<sub>2</sub>TTz, b) (PrOPh)<sub>2</sub>TTz, c) (BuOPh)<sub>2</sub>TTz.



### Section 3: Photophysical Characterization

#### Section 3.1: DFT Simulated Raman Spectra

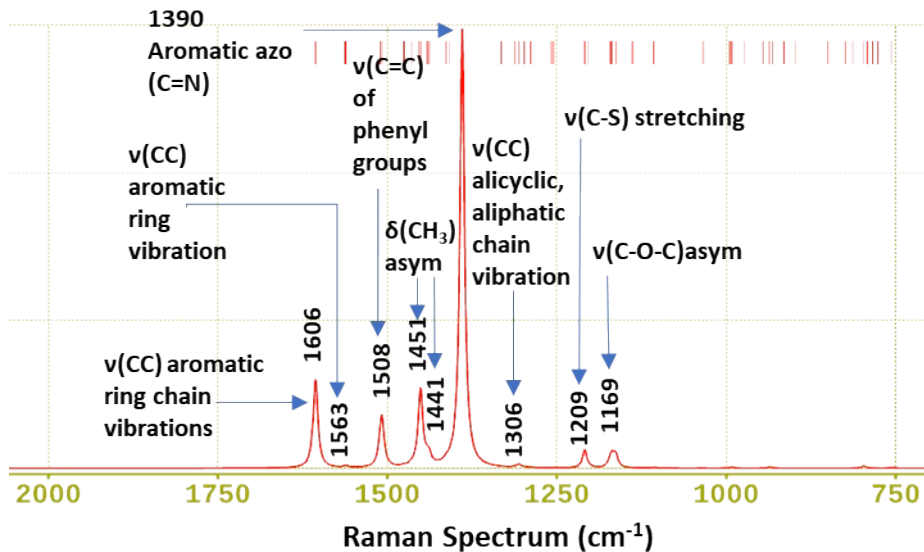

Figure S8: DFT Simulated Raman Spectra with peak assignments.

#### Section 3.2: Lattice-Phonon Raman Spectra of TTz Crystals

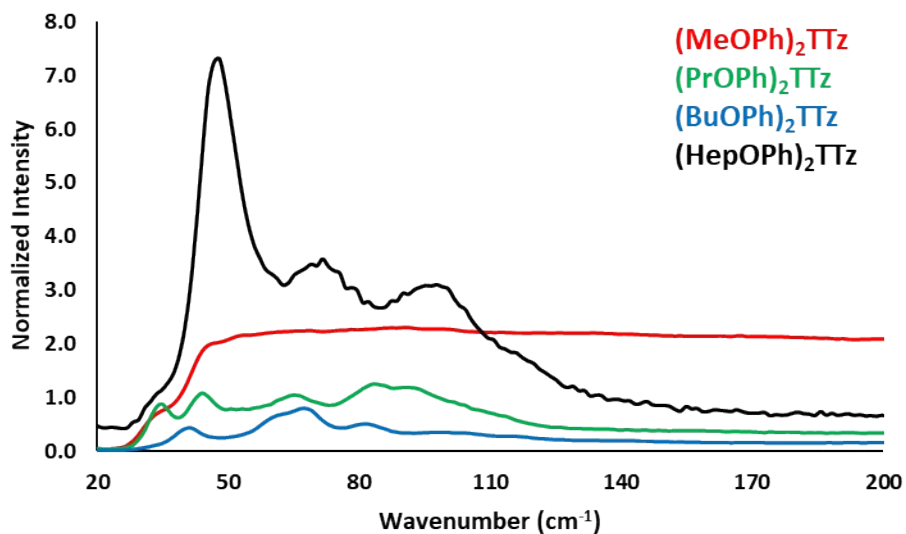

Figure S9: Lattice-Phonon Raman Spectra of TTz Crystals.

### Section 3.3: Time Dependent Photostability Measurement of TTz Crystals

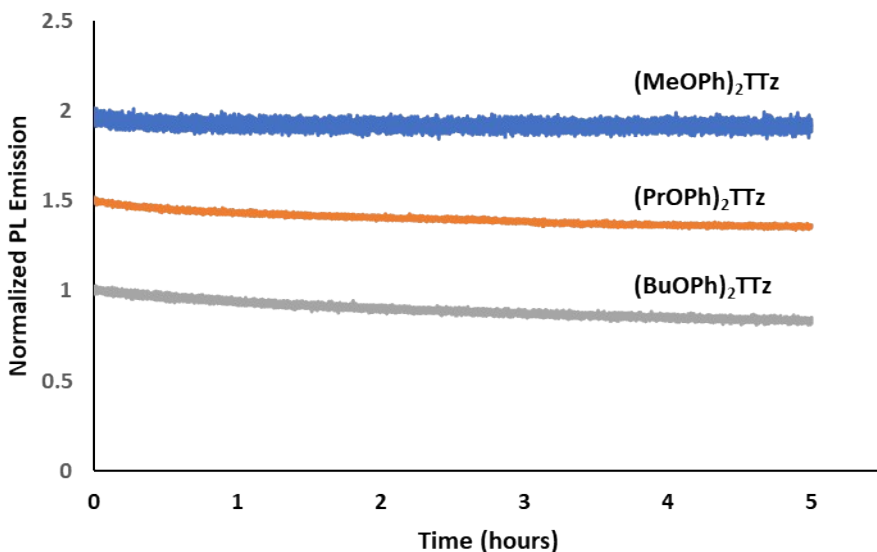

**Figure S10:** Time dependent photostability measurement of TTz Crystals under constant illumination by 400 nm in ambient conditions.

| Material                 | Decrease in PL Intensity after 5 hours of illumination |
|--------------------------|--------------------------------------------------------|
| (MeOPh) <sub>2</sub> TTz | 8 %                                                    |
| (PrOPh) <sub>2</sub> TTz | 14 %                                                   |
| (BuOPh) <sub>2</sub> TTz | 15 %                                                   |

### Section 4: References

(1) Shikhaliyev, N. Q.; Çelikesir, S. T.; Akkurt, M.; Bagirova, K. N.; Suleymanova, G. T.; Toze, F. A. Crystal structure and Hirshfeld surface analysis of (E)-1-(4-chlorophenyl)-2-[2, 2-dichloro-1-(4-fluorophenyl) ethenyl] diazene. *Acta Crystallographica Section E: Crystallographic Communications* **2019**, 75 (4), 465-469.
